# Supplementary material
Source: publisher figshare collection journal article supplement (https://karger.figshare.com/ndownloader/files/12727976)
Supplement: Supplementary file 1 [file 12727976]

**Supplementary Figure** **1.** Representative image of telomere-FISH (green) to *G. genetta* chromosomes (in DAPI, blue). Some chromosomes with interstitial telomeric sites (ITS) are identified.

**Supplementary Table 1.** Chromosomal homologies between *G. g. genetta, G. g. grantii* and *G. maculata*, having as reference the former, apparently the most conserved genome.

**Supplementary Table** **2.** FCA syntenic associations presence (+) or absence (-) in the different Carnivora families’ genomes studied until now with these probes. **?** indicates uncertain homology.
